# Supplementary material
Source: Springer Nature journal article supplement (https://www.springermedizin.de/resource/supplementary/12913_2008_788_MOESM2_ESM.pdf/9535576)

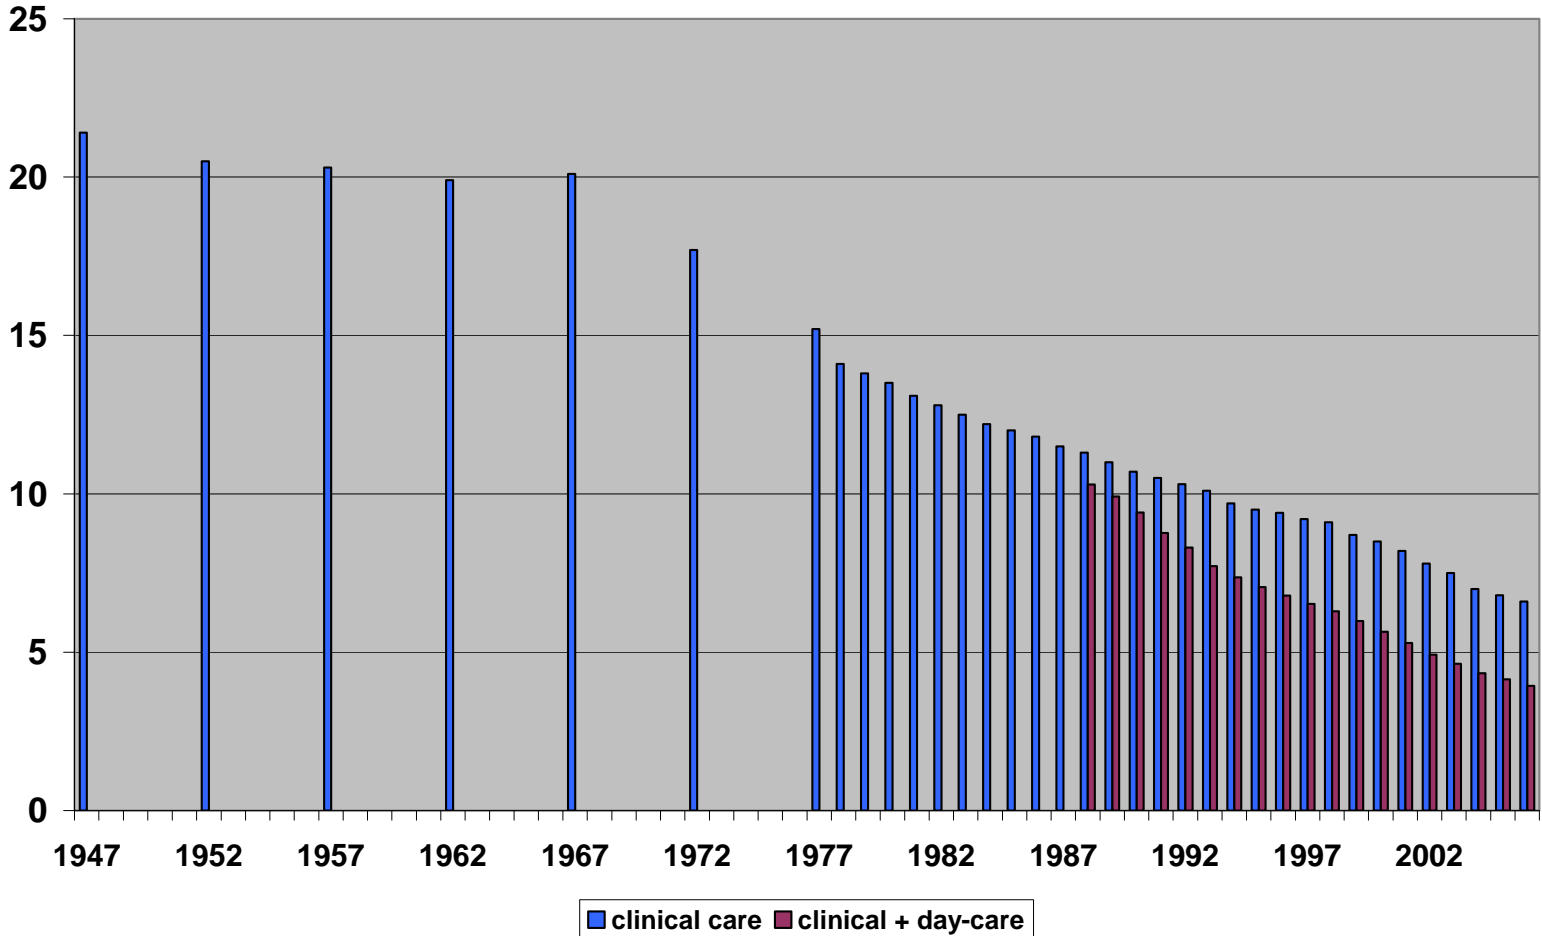

Supplement: MOESM2 [file 9535576]
